# Supplementary material for: Cytotoxic and Antimicrobial Compounds from the Marine-Derived Fungus, Penicillium Species
Source: PubMed Central journal article supplement (PMC6017105; doi:10.3390/molecules23020394), 2018-02-12
Supplement: molecules-23-00394-s001.pdf [file molecules-23-00394-s001.pdf]

## Supplementary information

# Cytotoxic and Antimicrobial Compounds from the Marine-Derived Fungus, *Penicillium* Species

Diaa T.A. Youssef <sup>1,\*</sup>, and Abdulrahman M. Alahdal <sup>2</sup>

<sup>1</sup> Department of Natural Products, Faculty of Pharmacy, King Abdulaziz University, Jeddah 21589, Saudi Arabia; dyoussef@kau.edu.

<sup>2</sup> Department of Clinical Pharmacy, Faculty of Pharmacy, King Abdulaziz University, Jeddah 21589, Saudi Arabia; aalahdal2@hotmail.com

\* Correspondence: dyoussef@kau.edu.sa; Tel.: +966-548-535-344

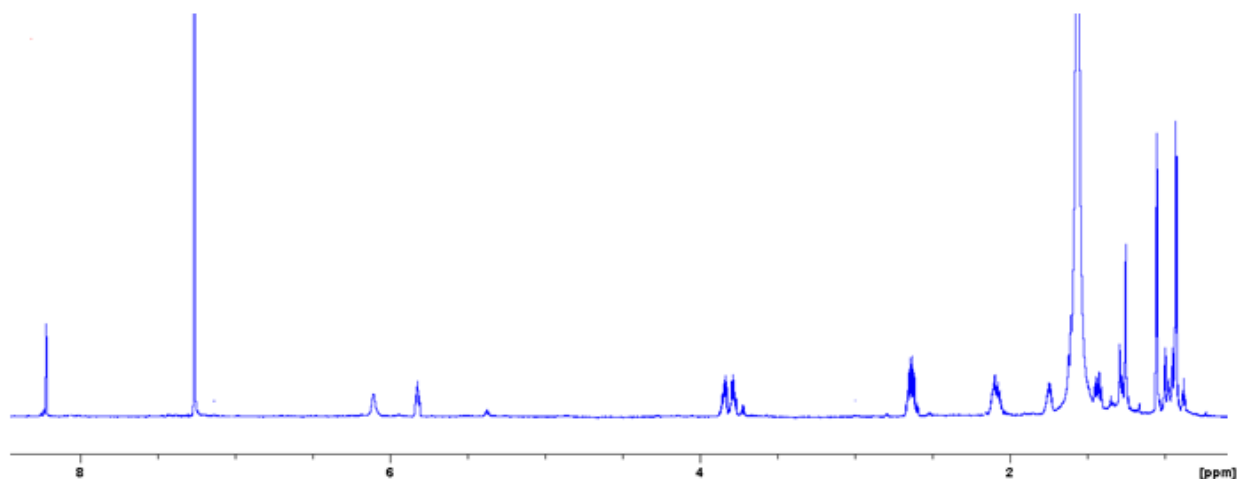

**Figure S1.** <sup>1</sup>H nuclear magnetic resonance (NMR) spectrum of compound **1** (850 MHz, CDCl<sub>3</sub>).

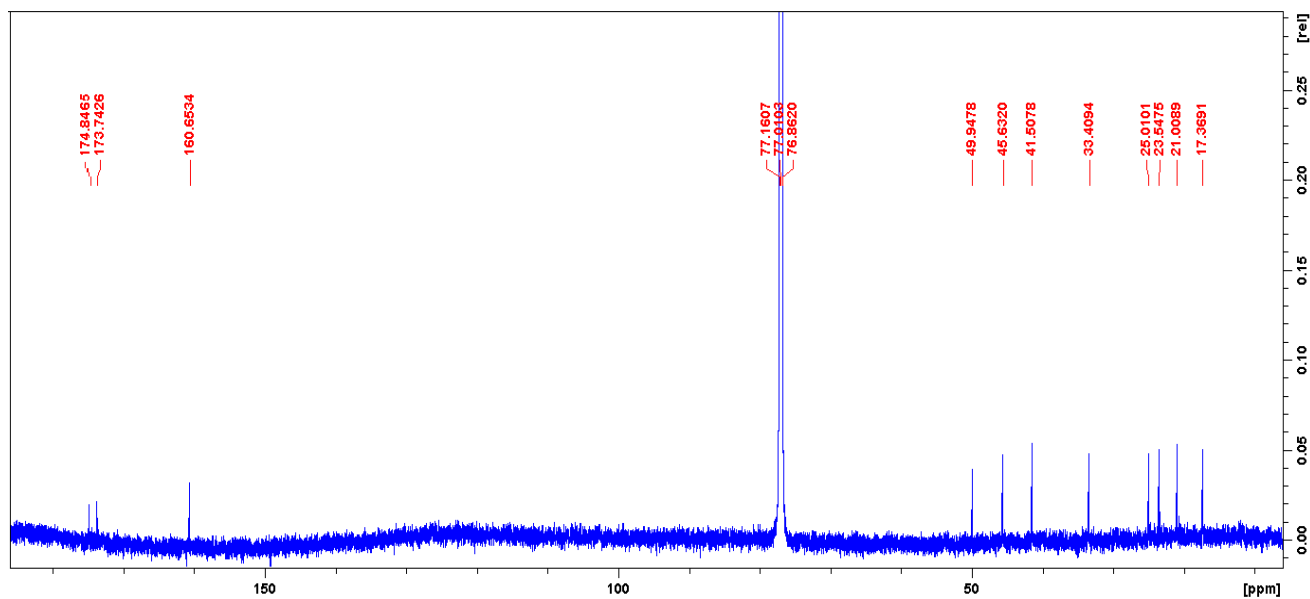

**Figure S2.** <sup>13</sup>C NMR spectrum of compound **1** (213 MHz, CDCl<sub>3</sub>).

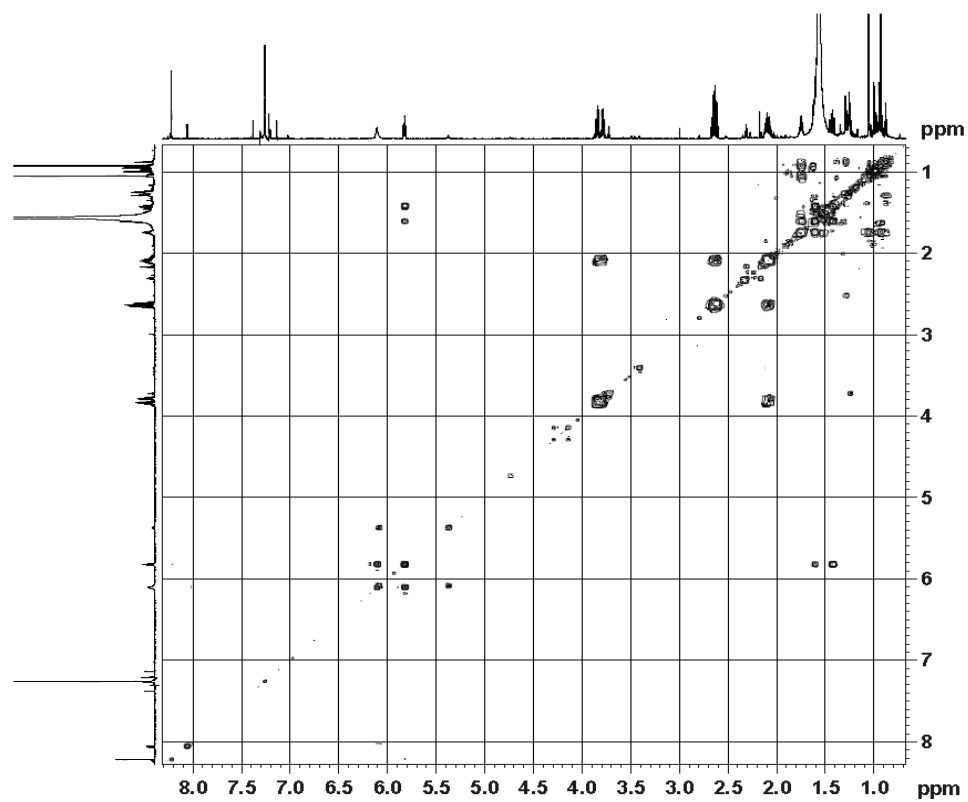

**Figure S3.**  $^1\text{H}$ - $^1\text{H}$  correlated spectroscopy (COSY) NMR spectrum of compound **1** (850 MHz,  $\text{CDCl}_3$ ).

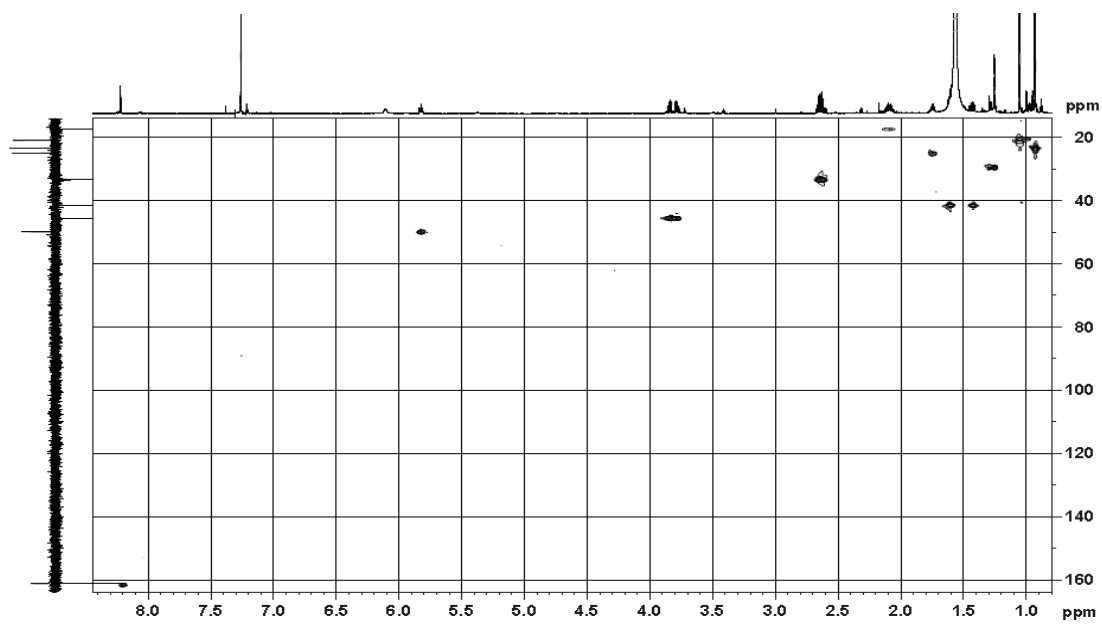

**Figure S4.** Multiplicity-edited heteronuclear single quantum coherence (HSQC) spectrum of compound **1** (850 MHz,  $\text{CDCl}_3$ ).

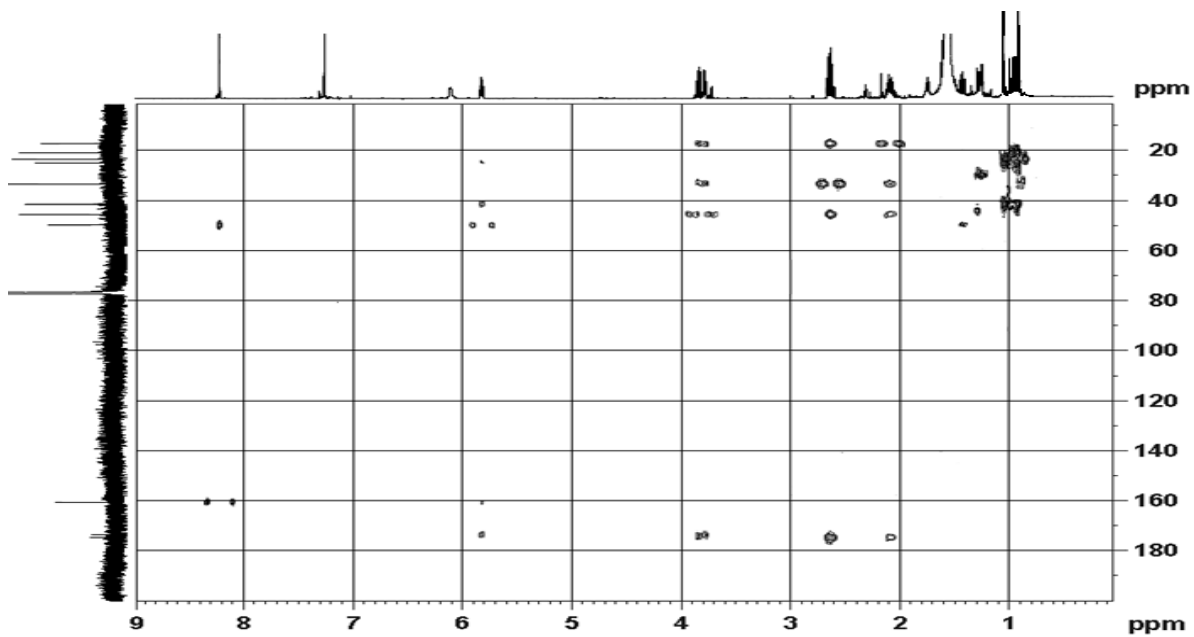

**Figure S5.** Heteronuclear multiple bond coherence (HMBC) spectrum of compound **1** (850 MHz,  $\text{CDCl}_3$ ).

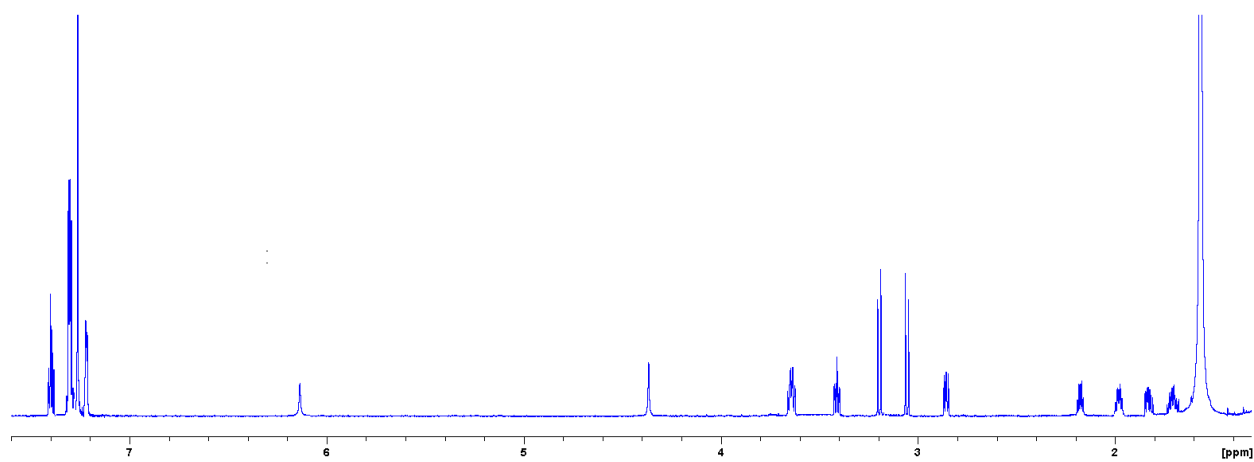

**Figure S6.**  $^1\text{H}$  NMR spectrum of compound **2** (850 MHz,  $\text{CDCl}_3$ ).

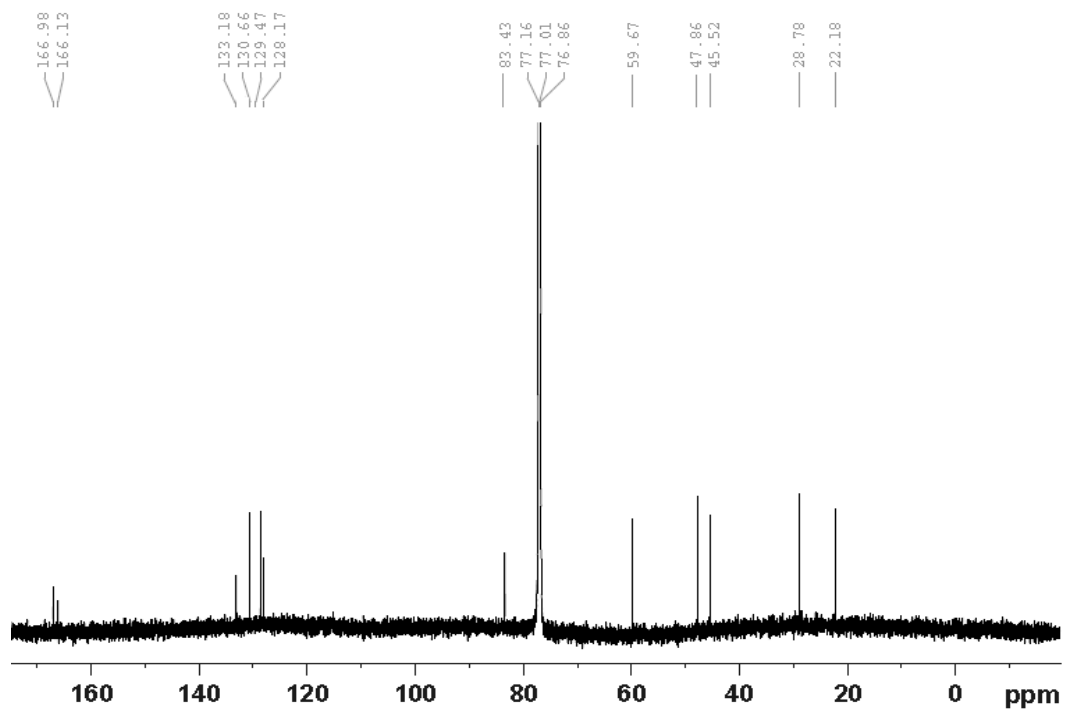

Figure S7.  $^{13}\text{C}$  NMR spectrum of compound **2** (213 MHz,  $\text{CDCl}_3$ ).

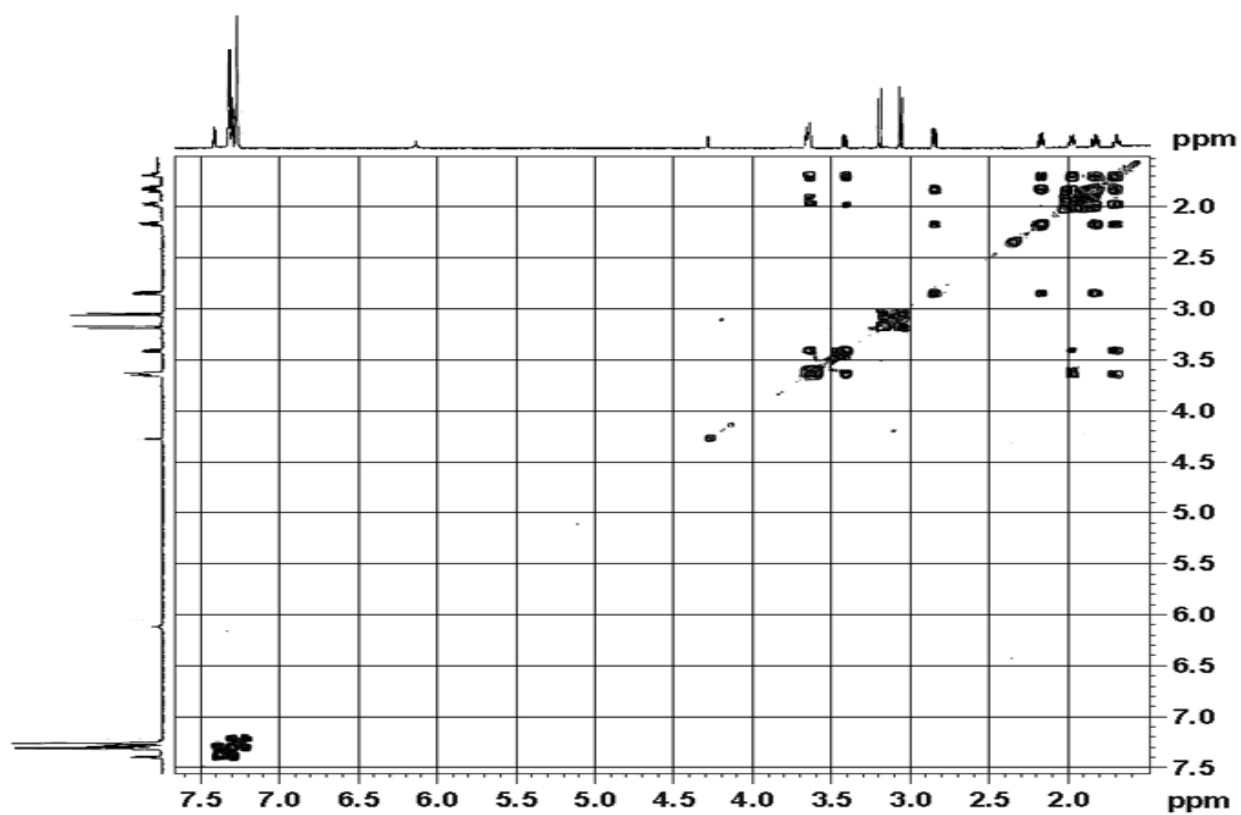

Figure S8.  $^1\text{H}$ - $^1\text{H}$  COSY spectrum of compound **2** (850 MHz,  $\text{CDCl}_3$ ).

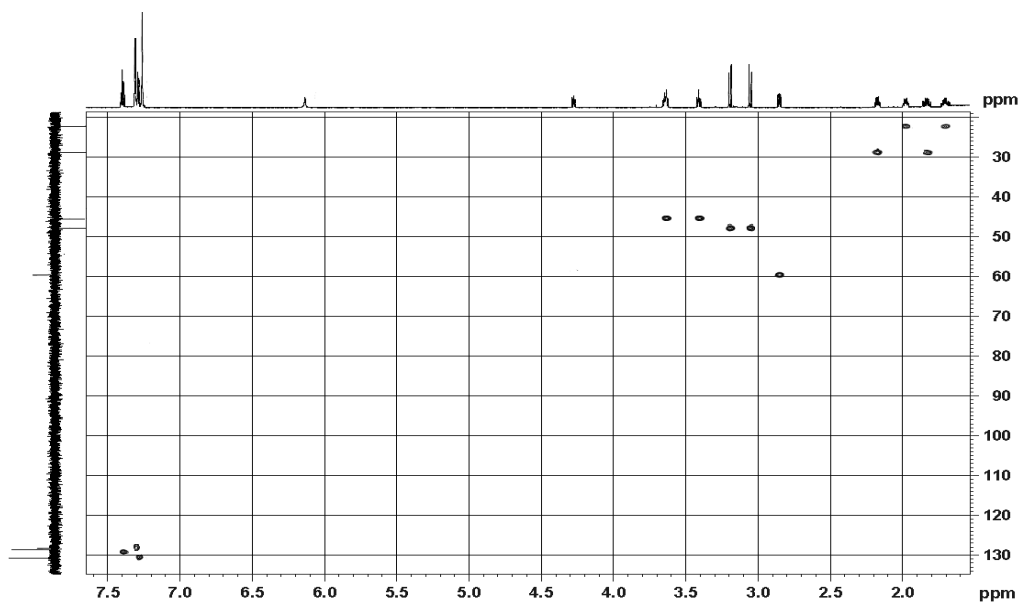

**Figure S9.** Multiplicity-edited HSQC spectrum of compound **2** (850 MHz,  $\text{CDCl}_3$ ).

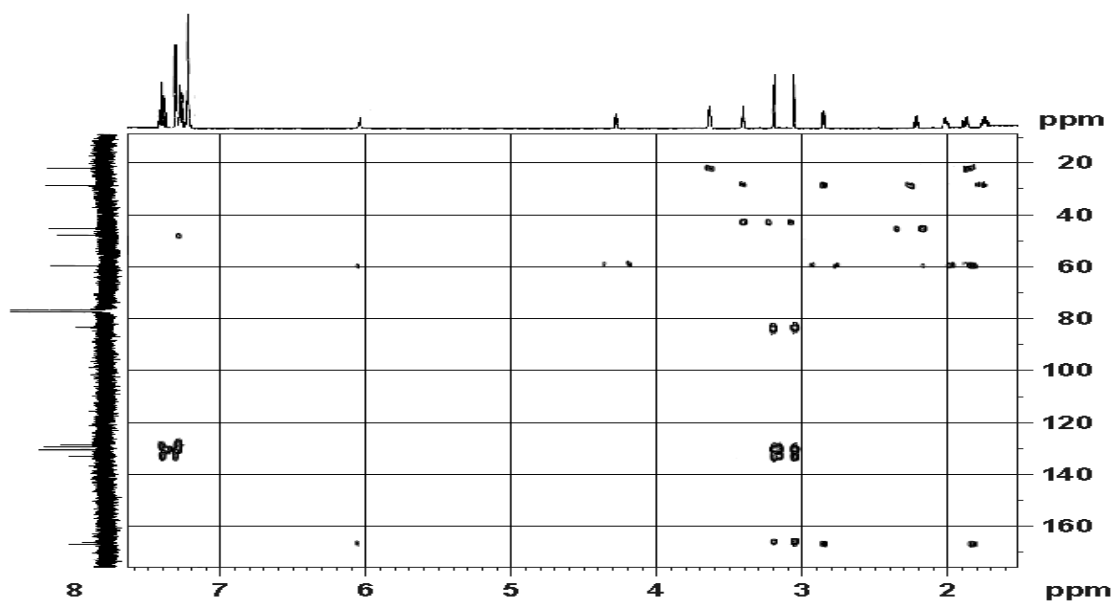

**Figure S10.** HMBC spectrum of compound **2** (850 MHz,  $\text{CDCl}_3$ ).

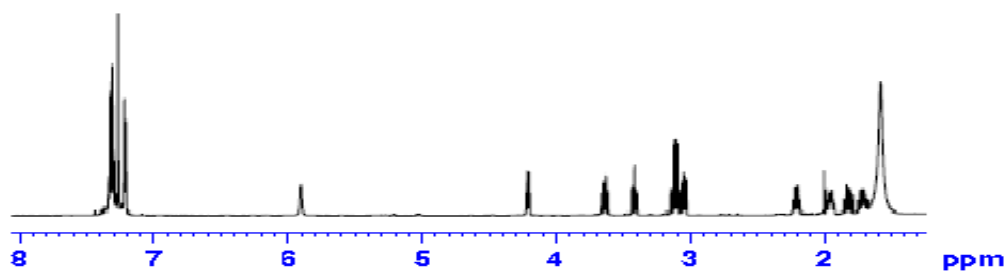

**Figure S11.**  $^1\text{H}$  NMR spectrum of compound **3** (600 MHz,  $\text{CDCl}_3$ ).

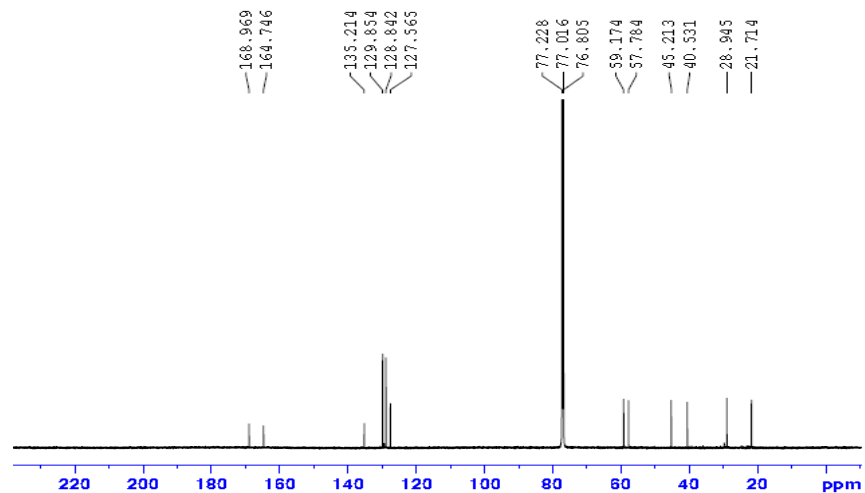

**Figure S12.**  $^{13}\text{C}$  NMR spectrum of compound **3** (150 MHz,  $\text{CDCl}_3$ ).

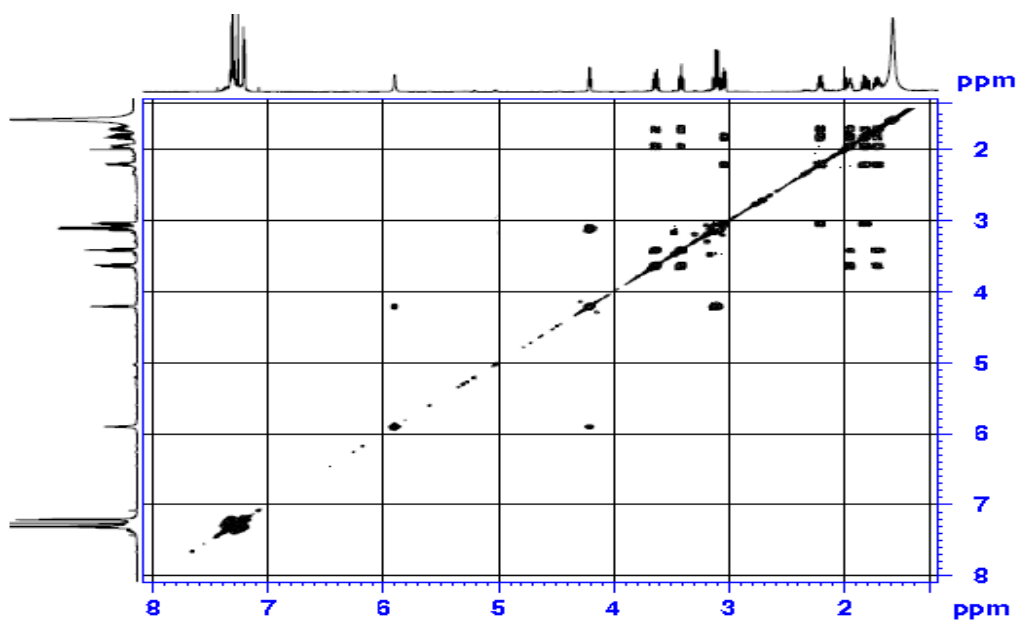

**Figure S13.**  $^1\text{H}$ - $^1\text{H}$  COSY spectrum of compound **3** (600 MHz,  $\text{CDCl}_3$ ).

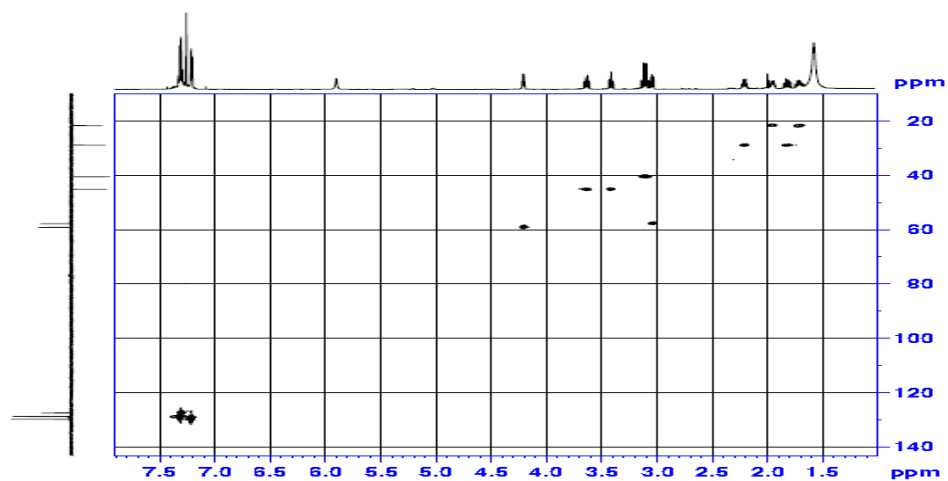

**Figure S14.** Multiplicity-edited HSQC spectrum of compound **3** (600 MHz,  $\text{CDCl}_3$ ).

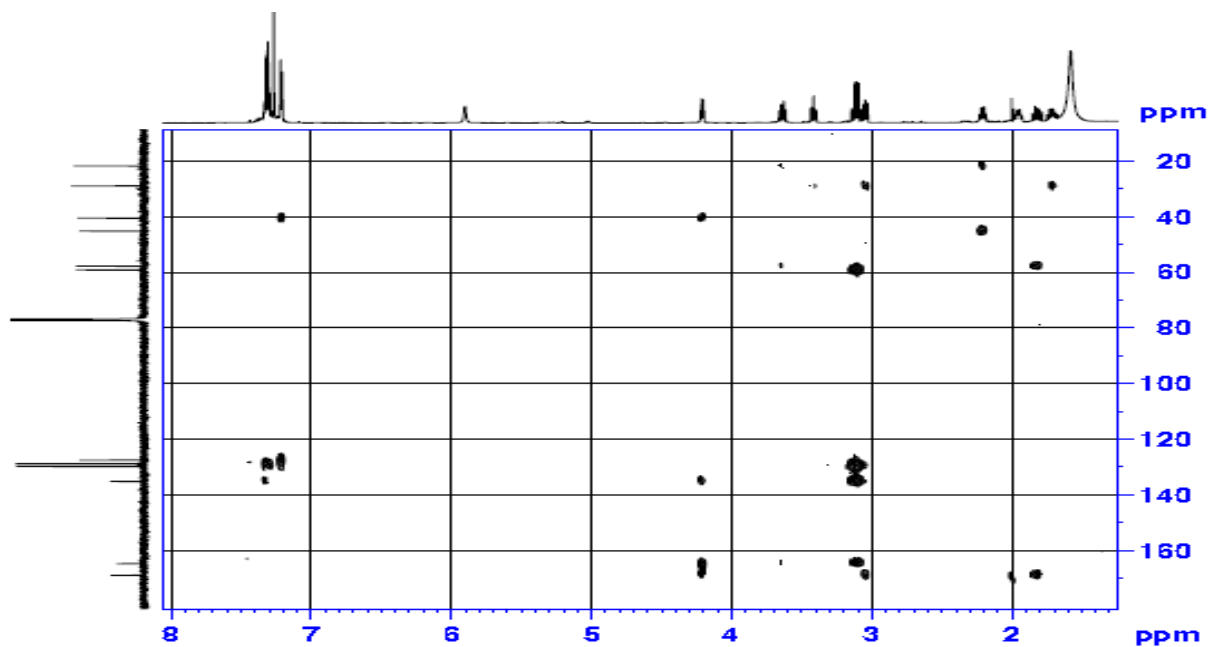

Figure S15. HMBC spectrum of compound **3** (600 MHz, CDCl<sub>3</sub>).

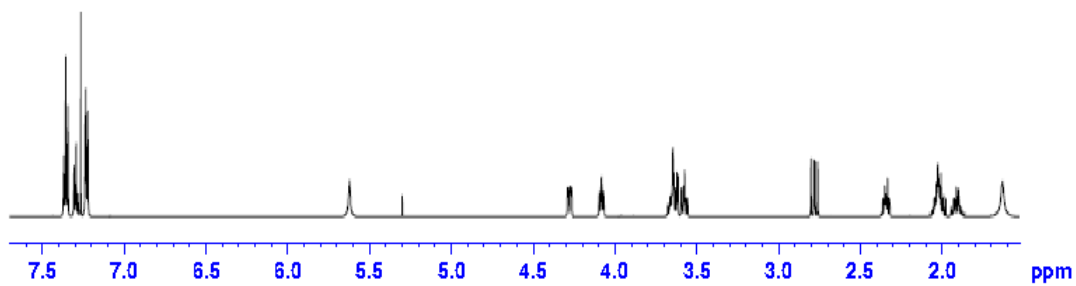

Figure S16. <sup>1</sup>H NMR spectrum of compound **4** (600 MHz, CDCl<sub>3</sub>).

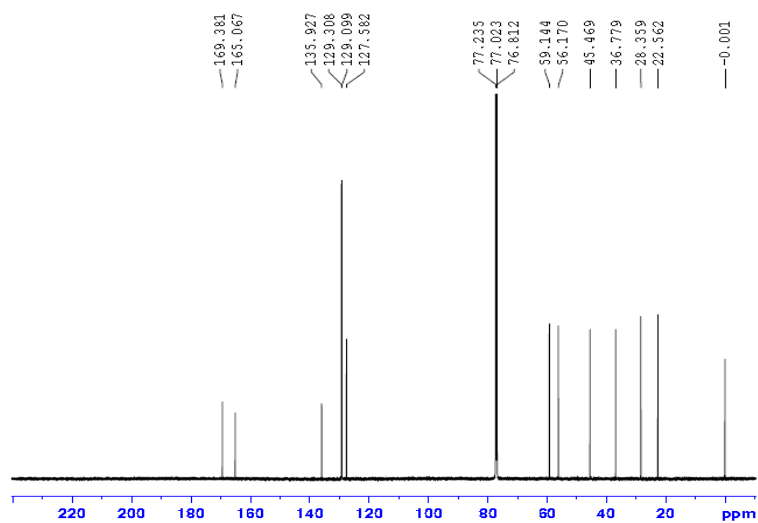

Figure S17. <sup>13</sup>C NMR spectrum of compound **4** (150 MHz, CDCl<sub>3</sub>).

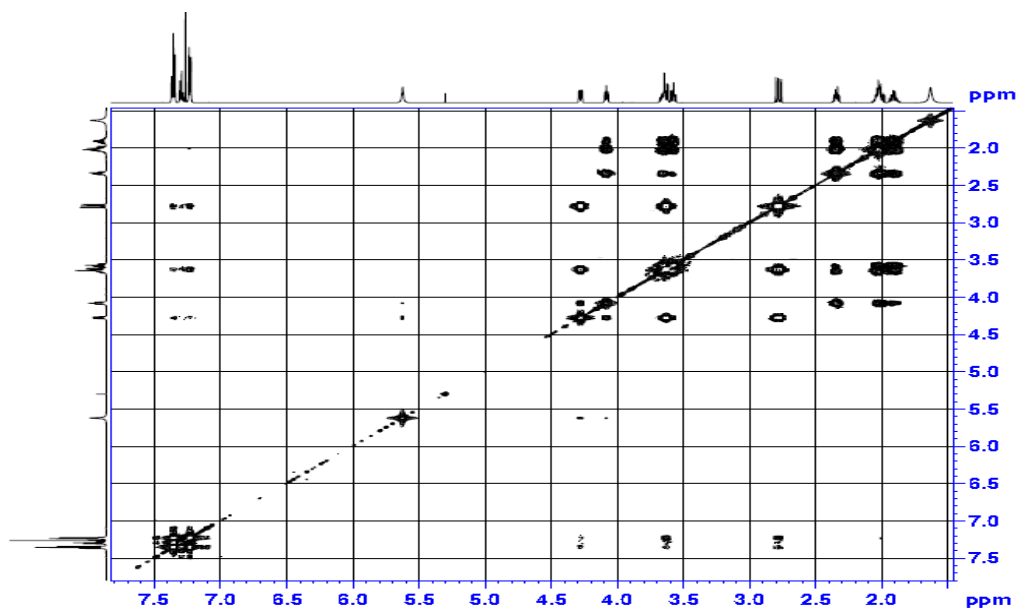

**Figure S18.**  $^1\text{H}$ - $^1\text{H}$  COSY spectrum of compound **4** (600 MHz,  $\text{CDCl}_3$ ).

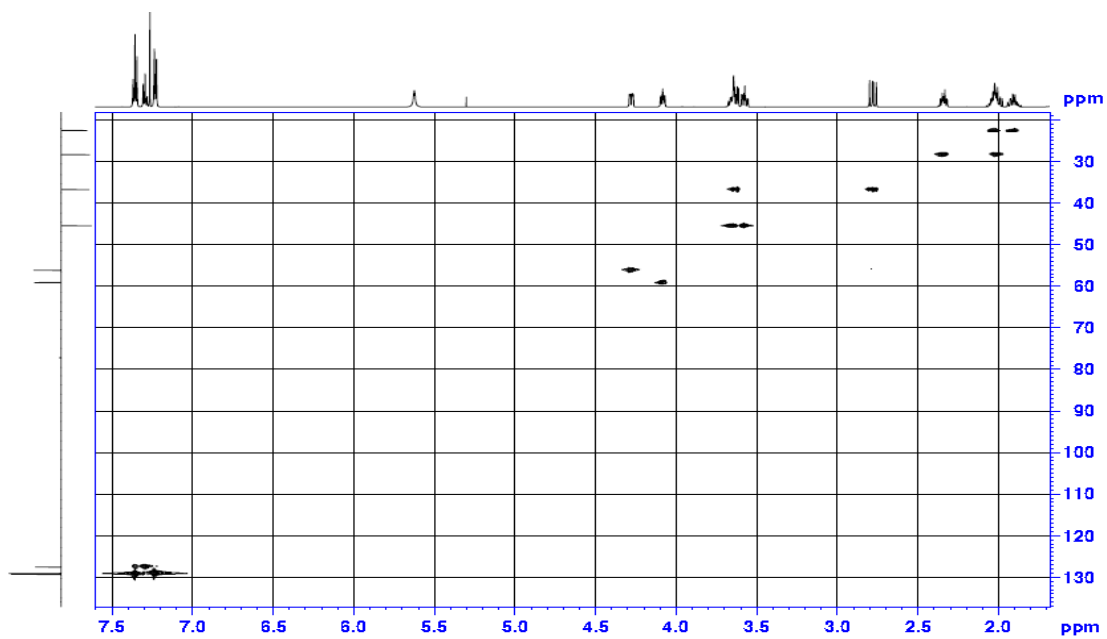

**Figure S19.** Multiplicity-edited HSQC spectrum of compound **4** (600 MHz,  $\text{CDCl}_3$ ).



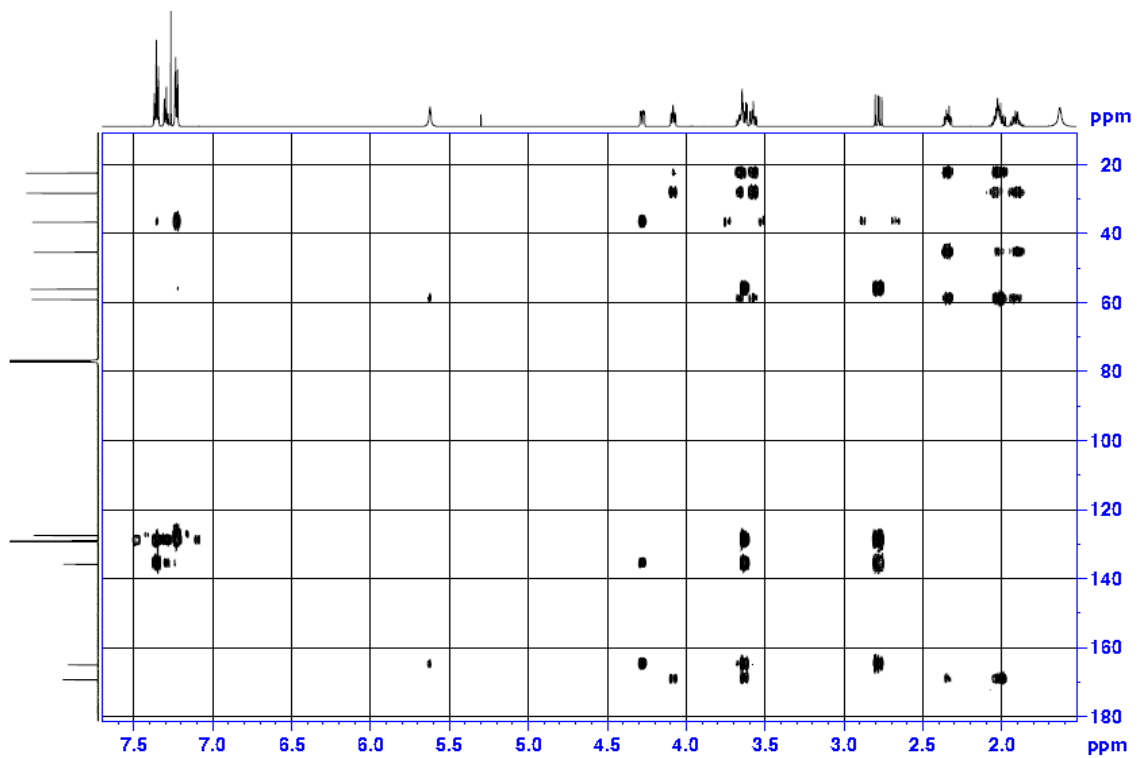

Figure S20. HMBC spectrum of compound 4 (600 MHz,  $\text{CDCl}_3$ ).
